# Supplementary material
Source: PubMed Central journal article supplement (PMC2991383)

5 hrs after Sham

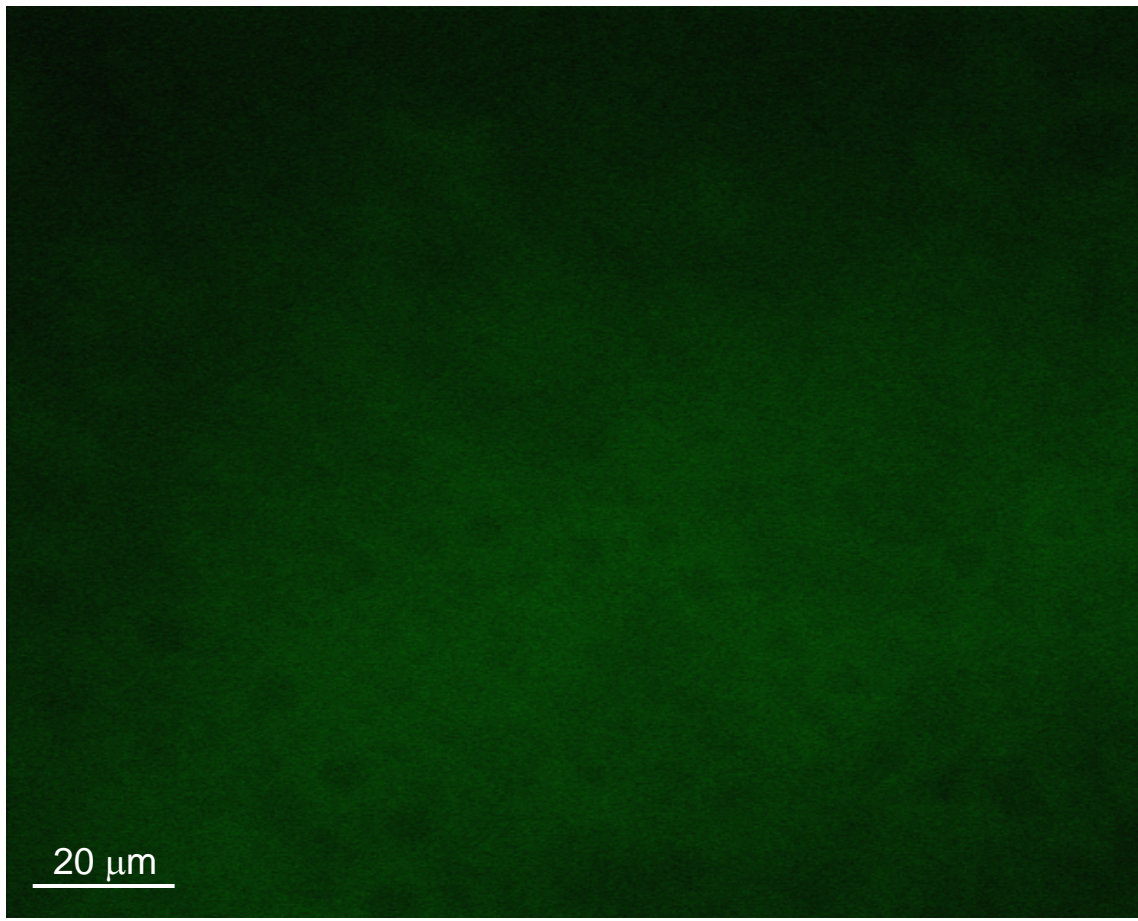

5 hrs after 30 min. RIR

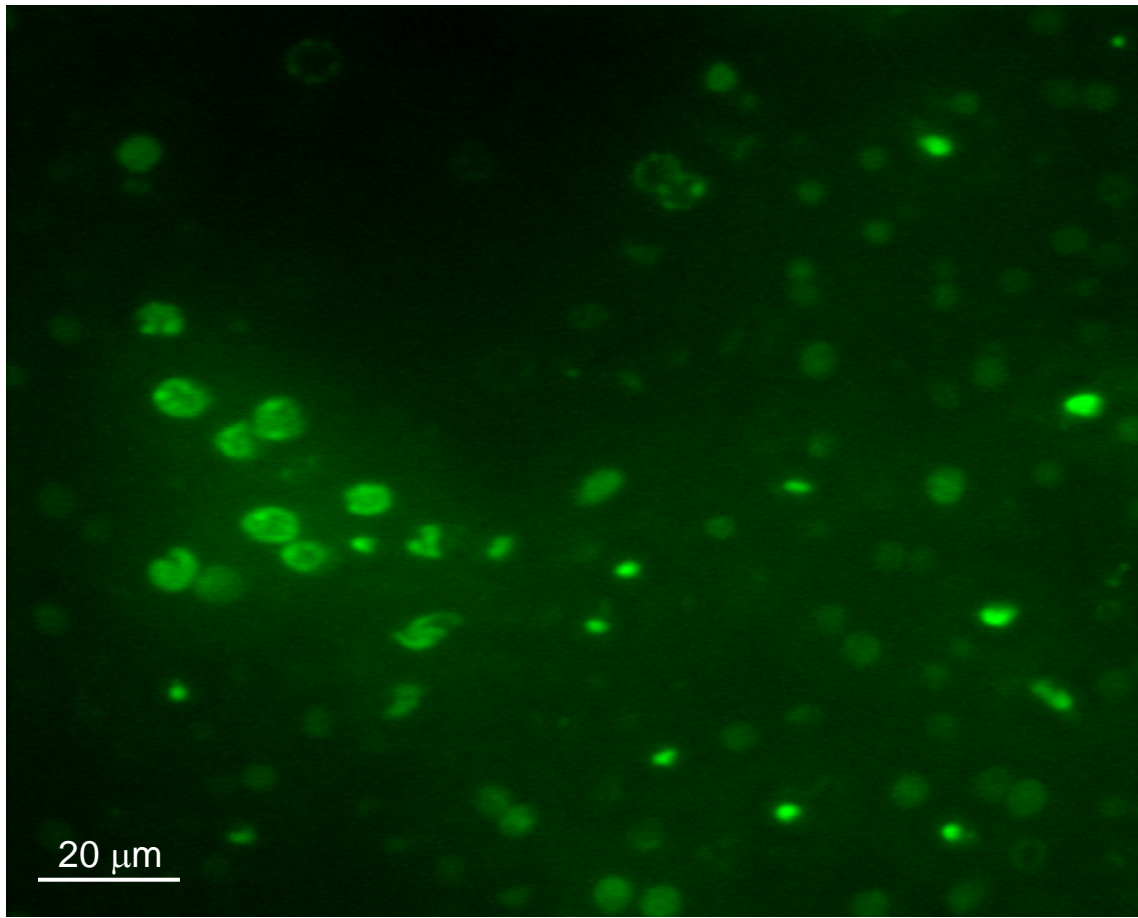

**Supplemental Figure 2**

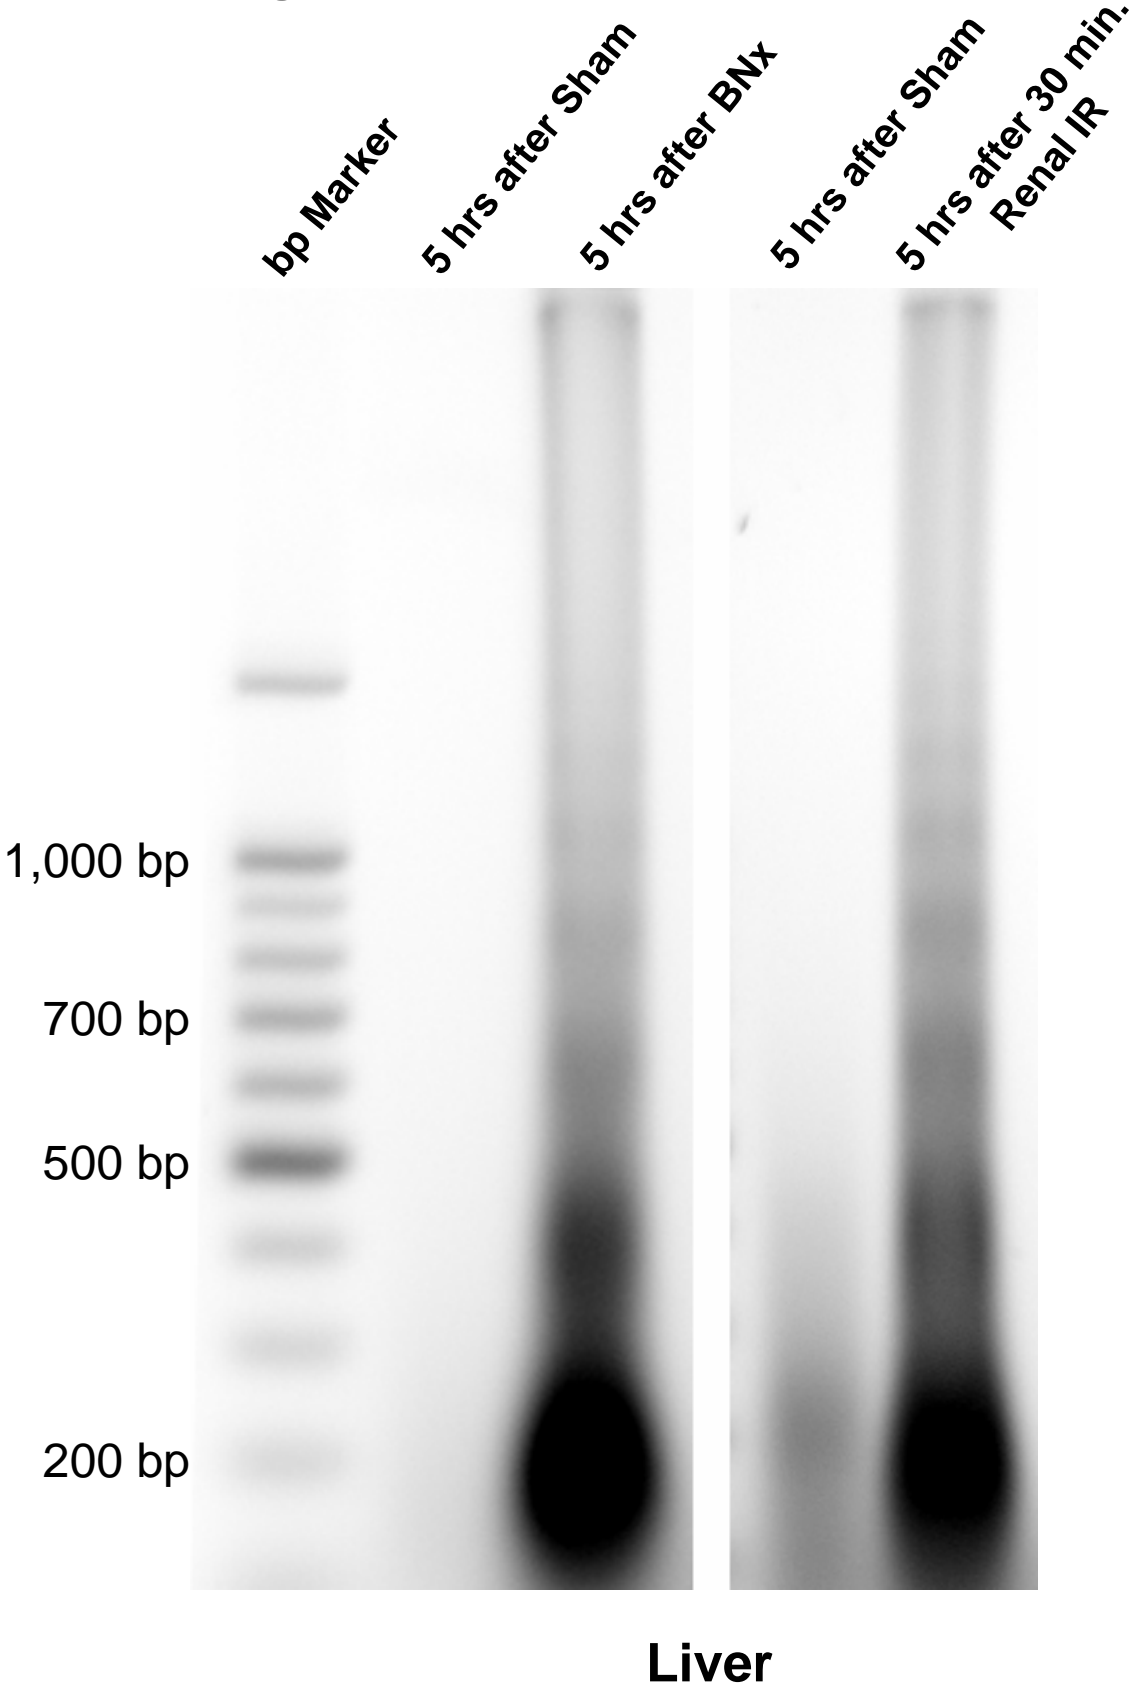

# Supplemental Figure 3

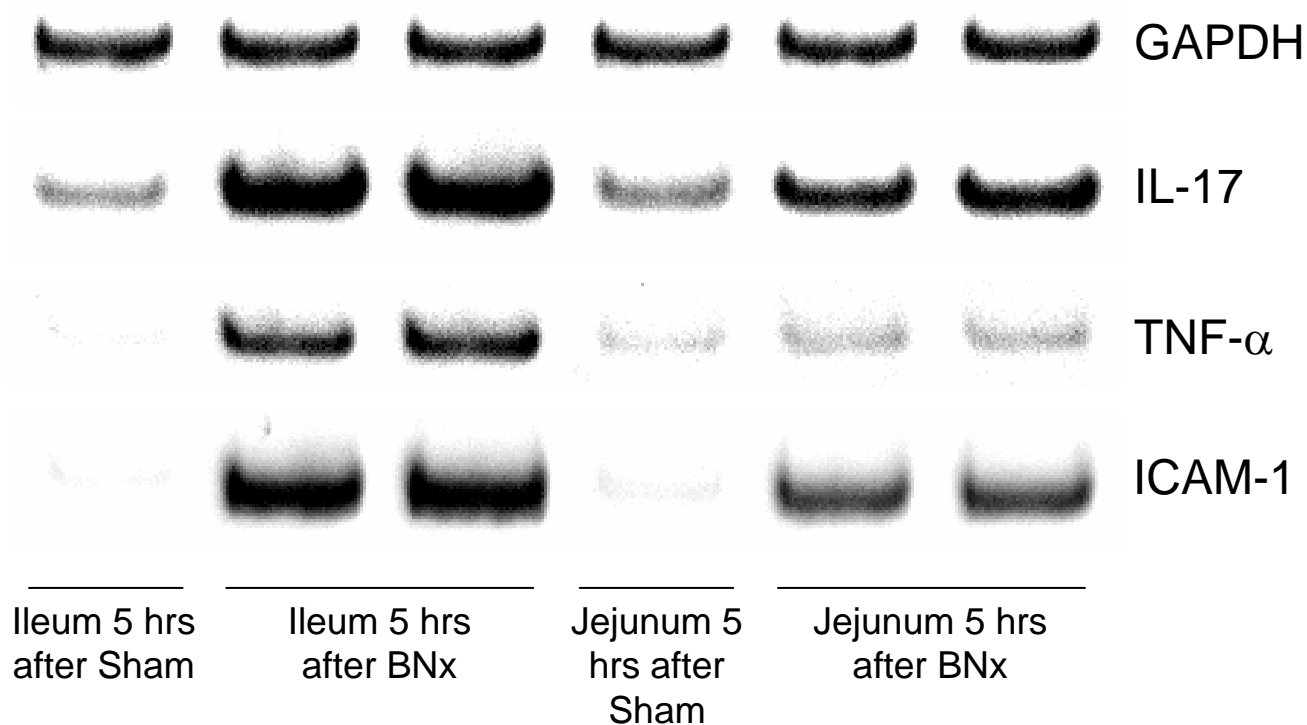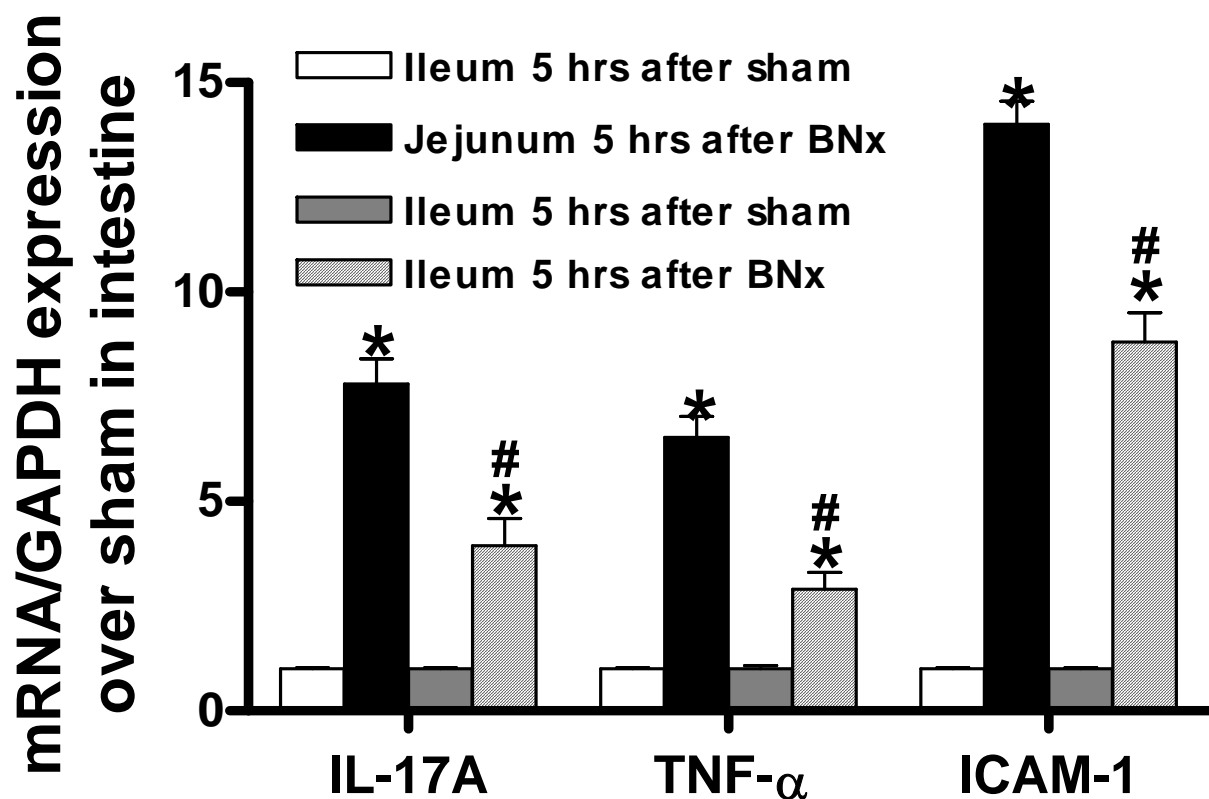

# Supplemental Figure 4

5 hrs after Unilateral nephrectomy

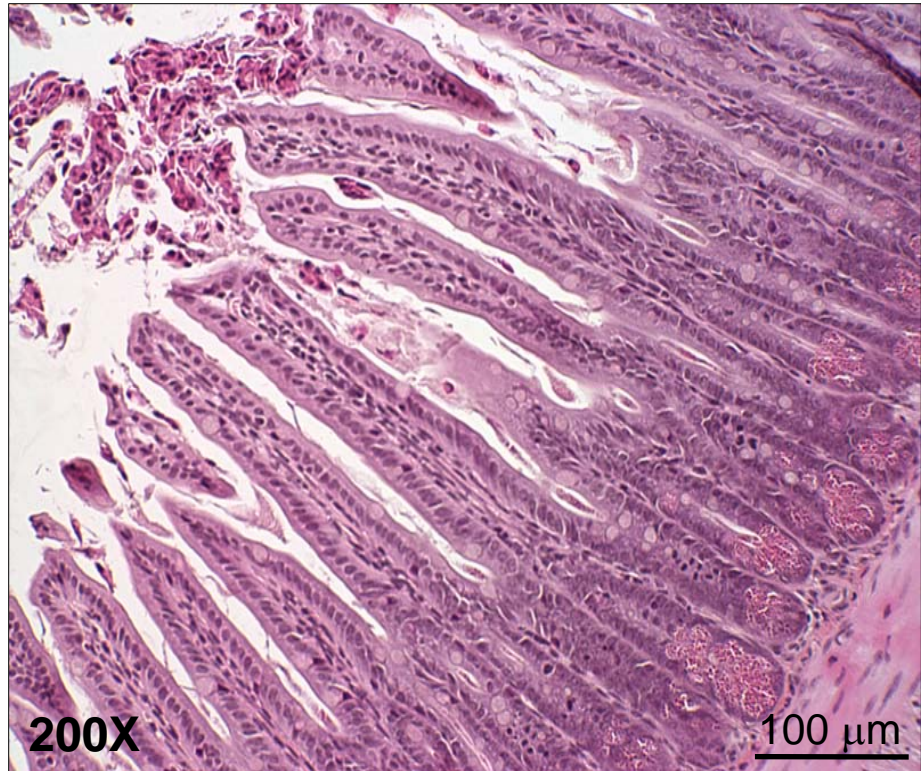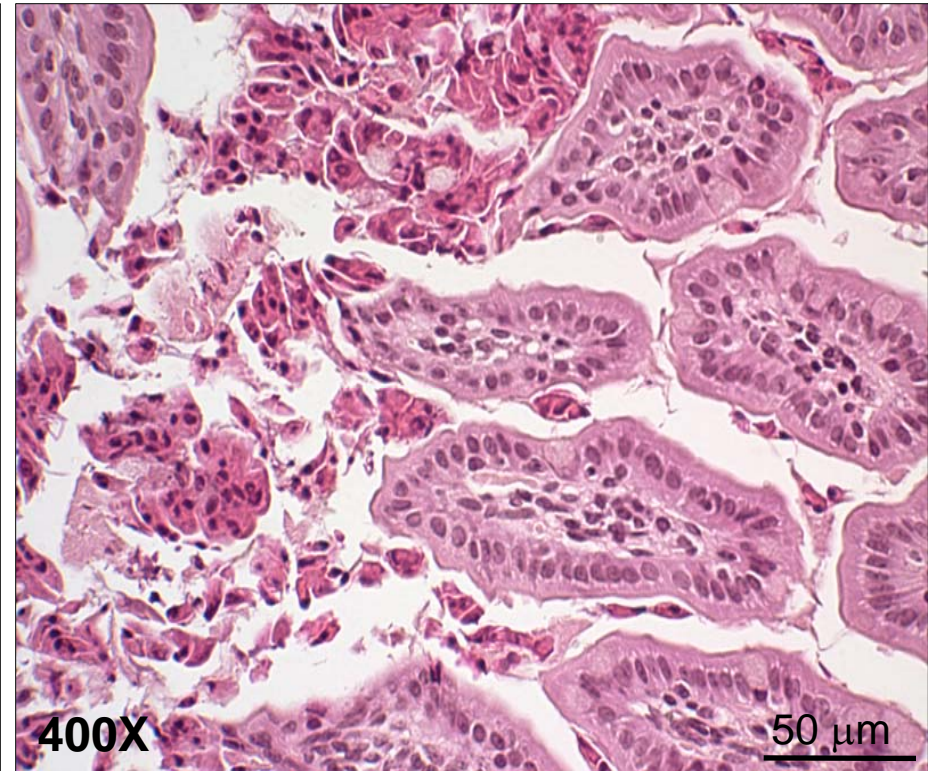



**5 hrs after bilateral nephrectomy**

**TUNEL stain**

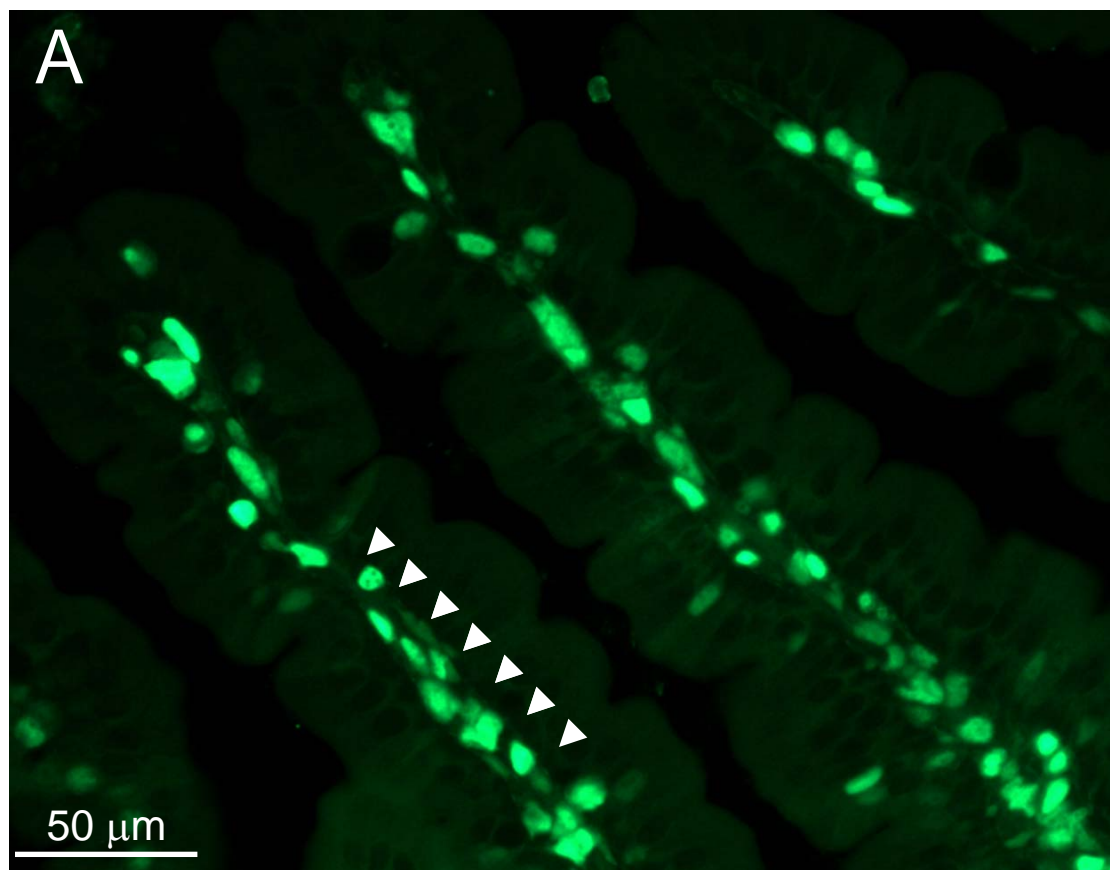

**CD34 stain**

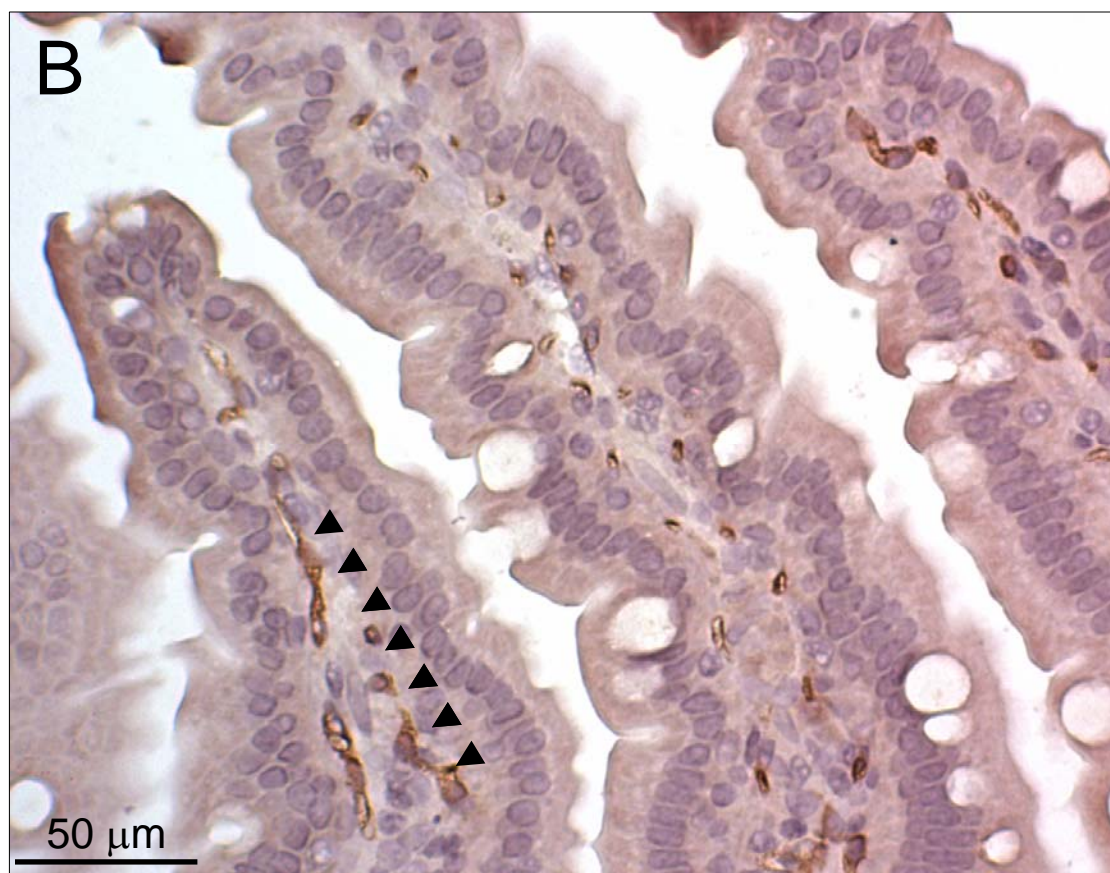

**400X**

**Supplemental Figure 6**

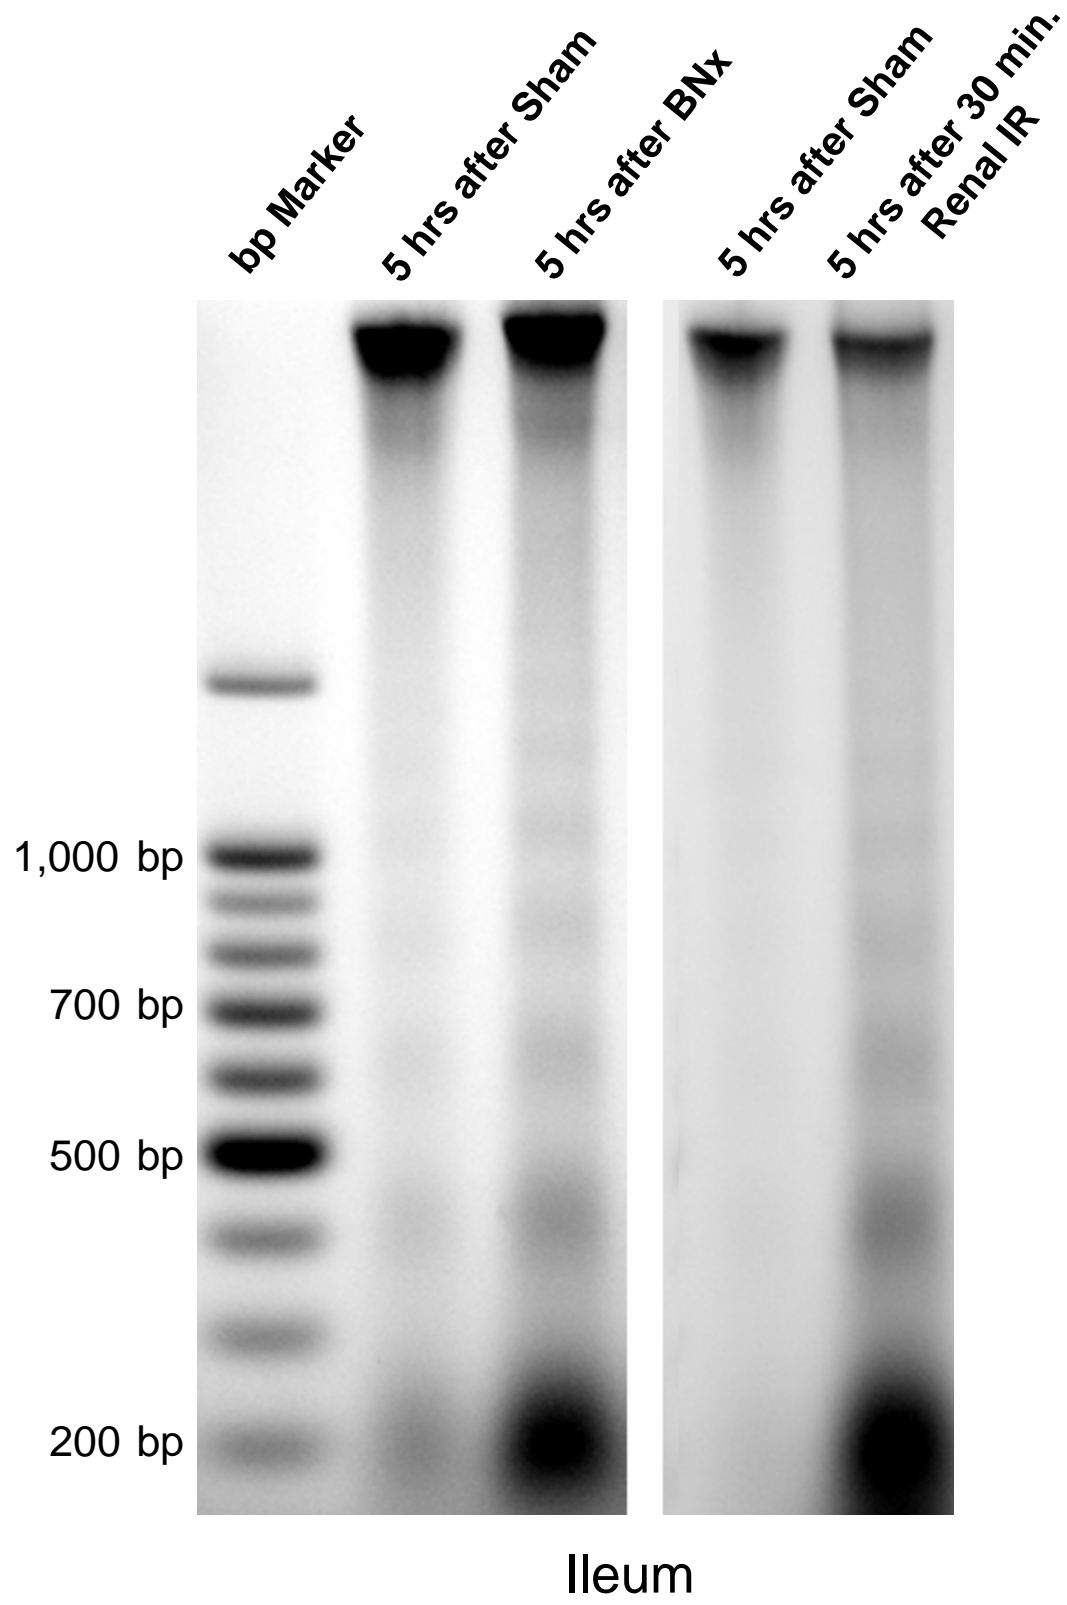

Supplement: NIHMS221291-supplement-01.pdf [file NIHMS221291-supplement-01.pdf]
